# Supplementary material
Source: HighWire-hosted journal article supplement (http://qualitysafety.bmj.com/highwire/filestream/160037/field_highwire_adjunct_files/1/bmjqs-2020-012370supp002_data_supplement.pdf)
Supplement: bmjqs-2020-012370supp002_data_supplement.pdf [file bmjqs-2020-012370supp002_data_supplement.pdf]

Supplementary Appendix II: **“Handoff improvement and adverse events-reduction program implementation in paediatric intensive care units in Argentina: a stepped-wedge trial”**

Figure 1. Study sample in stepped wedge cluster randomized trial, showing health records reviewed in each cluster and period.

| PICUs | Month of the study |        |        |        |        |        |        |        |        |        |        |
|-------|--------------------|--------|--------|--------|--------|--------|--------|--------|--------|--------|--------|
|       | Jul-18             | Aug-18 | Sep-18 | Oct-18 | Nov-18 | Dec-18 | Jan-19 | Feb-19 | Mar-19 | Apr-19 | May-19 |
| 1     | 27                 | 21     | 15     | 18     | 10     | 13     | 22     | 8      | 11     | 14     | 14     |
| 2     | 30                 | 29     | 24     | 17     | 12     | 12     | 14     | 16     | 12     | 15     | 24     |
| 3     | 12                 | 16     | 13     | 14     | 25     | 22     | 15     | 13     | 14     | 18     | 17     |
| 4     | 30                 | 30     | 30     | 30     | 30     | 30     | 30     | 30     | 30     | 30     | 29     |
| 5     | 30                 | 30     | 30     | 30     | 30     | 30     | 30     | 30     | 30     | 30     | 29     |
| 6     | 27                 | 24     | 27     | 24     | 24     | 21     | 17     | 21     | 18     | 17     | 30     |

Control

Intervention

Table 1. Preventable adverse event per site and per period.

| Site | Rates for 1000 days of hospitalization<br>(95% CI) |                   | Rate of rates<br>(Intervention/Control)<br>(95% CI) | p-Value* |
|------|----------------------------------------------------|-------------------|-----------------------------------------------------|----------|
|      | Intervention                                       | Control           |                                                     |          |
| 1    | 27.6 (20.8;36.7)                                   | 37.4 (29.5;47.4)  | 0.74 (0.51;1.07)                                    | 0.109    |
| 2    | 21.3 (14.2;32.1)                                   | 32.2 (23.3;44.4)  | 0.66 (0.39;1.11)                                    | 0.122    |
| 3    | 84.5 (66.1;108.0)                                  | 84.4 (65.7;108.3) | 1.00 (0.71;1.42)                                    | 0.995    |
| 4    | 82.7 (65.4;104.5)                                  | 73.5 (61.8;87.4)  | 1.12 (0.84;1.51)                                    | 0.430    |
| 5    | 112.8 (87.9;144.6)                                 | 139.8 (106.2;184) | 0.81 (0.56;1.17)                                    | 0.257    |
| 6    | 42.2 (28.6;62.2)                                   | 28.9 (15.8;52.8)  | 1.46 (0.71;2.98)                                    | 0.304    |

\*p-value was obtained from the generalized mixed linear model adjusted by the time effect.

Table 2: Total amount of adverse event and preventable adverse event by type and group

|                                                                                                           | Adverse events          |                    | Non preventable adverse events |                    |
|-----------------------------------------------------------------------------------------------------------|-------------------------|--------------------|--------------------------------|--------------------|
|                                                                                                           | Intervention<br>(N=698) | Control<br>(N=767) | Intervention<br>(N=698)        | Control<br>(N=767) |
| <b>Health-care-associated infections</b>                                                                  |                         |                    |                                |                    |
| Central line-associated blood stream infection                                                            | 11                      | 19                 | 10                             | 19                 |
| Sepsis/bacteremia unrelated to catheter                                                                   | 18                      | 30                 | 17                             | 30                 |
| Ventilator-associated pneumonia                                                                           | 59                      | 57                 | 59                             | 56                 |
| Nosocomial pneumonia, not ventilator-related                                                              | 8                       | 13                 | 5                              | 8                  |
| Catheter-associated UTI                                                                                   | 43                      | 74                 | 43                             | 74                 |
| Hospital-acquired viral illness                                                                           | 11                      | 17                 | 10                             | 17                 |
| Surgical site infection                                                                                   | 9                       | 3                  | 9                              | 2                  |
| Endometritis                                                                                              | 0                       | 0                  | 0                              | 0                  |
| C. difficile colitis                                                                                      | 2                       | 1                  | 2                              | 1                  |
| <b>Respiratory</b>                                                                                        |                         |                    |                                |                    |
| Acute respiratory failure (RR elevated or depressed)                                                      | 19                      | 17                 | 16                             | 14                 |
| Respiratory distress, not acute failure                                                                   | 2                       | 0                  | 0                              | 0                  |
| Pneumothorax/hemothorax/SQ air                                                                            | 12                      | 15                 | 11                             | 13                 |
| Barotrauma                                                                                                | 3                       | 0                  | 3                              | 0                  |
| Atelectasis (CXR findings with increased [A-a] O <sub>2</sub> gradient)                                   | 11                      | 5                  | 7                              | 4                  |
| Bronchospasm                                                                                              | 0                       | 2                  | 0                              | 0                  |
| Aspiration (witnessed, with or without CXR changes)                                                       | 1                       | 1                  | 1                              | 1                  |
| Pulmonary Embolus                                                                                         | 0                       | 0                  | 0                              | 0                  |
| Post extubation stridor                                                                                   | 13                      | 22                 | 2                              | 3                  |
| R mainstem bronchus intubation                                                                            | 1                       | 1                  | 1                              | 1                  |
| Unplanned extubation                                                                                      | 0                       | 0                  | 0                              | 0                  |
| Reintubation within 24 hrs of planned extubation                                                          | 23                      | 18                 | 23                             | 18                 |
| Other Respiratory (note: ventilator-associated pneumonia and other pneumonia is under infections section) | 35                      | 37                 | 7                              | 9                  |
| <b>Gastrointestinal</b>                                                                                   |                         |                    |                                |                    |
| Nausea / vomiting                                                                                         | 0                       | 1                  | 0                              | 0                  |
| Diarrhea                                                                                                  | 0                       | 1                  | 0                              | 1                  |
| Constipation                                                                                              | 6                       | 2                  | 4                              | 2                  |
| Gastric distension                                                                                        | 0                       | 0                  | 0                              | 0                  |
| Pancreatitis                                                                                              | 0                       | 0                  | 0                              | 0                  |

|                                                                                                                             |    |    |    |    |
|-----------------------------------------------------------------------------------------------------------------------------|----|----|----|----|
| Jaundice / hepatic insult (elevated bilirubin / elevated ALT and/or AST)                                                    | 9  | 4  | 0  | 0  |
| Ileus                                                                                                                       | 0  | 2  | 0  | 2  |
| Other GI                                                                                                                    | 1  | 4  | 1  | 3  |
| <b>Surgical / Obstetrical</b>                                                                                               |    |    |    |    |
| Post-operative hemorrhage                                                                                                   | 8  | 6  | 3  | 4  |
| Post-operative hematoma                                                                                                     | 2  | 0  | 1  | 0  |
| Laceration or other injury of organ                                                                                         | 0  | 2  | 0  | 1  |
| Unplanned removal of organ due to intra-operative injury                                                                    | 0  | 0  | 0  | 0  |
| Vascular injury                                                                                                             | 1  | 2  | 0  | 0  |
| Nerve injury                                                                                                                | 0  | 0  | 0  | 0  |
| Surgical anastomosis failure                                                                                                | 0  | 1  | 0  | 1  |
| Wound dehiscence                                                                                                            | 4  | 5  | 1  | 1  |
| Retained foreign instrument or sponge                                                                                       | 0  | 0  | 0  | 0  |
| Failed procedure (e.g., need for revision)                                                                                  | 5  | 3  | 5  | 0  |
| Unplanned return to surgery                                                                                                 | 8  | 3  | 5  | 0  |
| Uterine rupture                                                                                                             | 0  | 0  | 0  | 0  |
| Major placental abruption                                                                                                   | 0  | 0  | 0  | 0  |
| Unplanned / emergency hysterectomy                                                                                          | 0  | 0  | 0  | 0  |
| Fetal / neonatal complications associated with delivery (e.g. stillbirth, birth trauma, dystocia, unplanned NICU admission) | 0  | 0  | 0  | 0  |
| Other surgical or obstetrical                                                                                               | 10 | 5  | 2  | 4  |
| <b>Renal/Fluids/Endocrine</b>                                                                                               |    |    |    |    |
| Fluid overload (new CHF, severe edema or increased [A-a] O <sub>2</sub> gradient associated with IV fluids)                 | 6  | 4  | 6  | 4  |
| Dehydration / Oliguria (urine output <0.5cc/kg TBW > 4 hrs; or CVP < 5 or PAWP < 8 with signs of dehydration)               | 0  | 0  | 0  | 0  |
| Acute renal failure (increased Creat > 50% with or without oliguria)                                                        | 12 | 16 | 6  | 8  |
| Metabolic acidosis (HCO <sub>3</sub> < 20)                                                                                  | 1  | 2  | 0  | 1  |
| Metabolic alkalosis (HCO <sub>3</sub> > 30)                                                                                 | 0  | 1  | 0  | 1  |
| Adrenal insufficiency (Low baseline or ACTH stimulation test cortisol and / or responds to corticosteroid Rx)               | 0  | 0  | 0  | 0  |
| Hyperglycemia                                                                                                               | 3  | 4  | 1  | 4  |
| Hypoglycemia                                                                                                                | 7  | 14 | 7  | 10 |
| Hyperkalemia                                                                                                                | 1  | 1  | 0  | 1  |
| Other Renal / Fluids / Endocrine                                                                                            | 13 | 13 | 10 | 8  |
| <b>Neurologic</b>                                                                                                           |    |    |    |    |

|                                                                                                     |    |    |    |    |
|-----------------------------------------------------------------------------------------------------|----|----|----|----|
| Oversedation (drug related)                                                                         | 2  | 8  | 2  | 6  |
| Delirium / Encephalopathy                                                                           | 0  | 5  | 0  | 1  |
| Seizures                                                                                            | 6  | 3  | 3  | 2  |
| CVA / Intracerebral hemorrhage                                                                      | 0  | 1  | 0  | 1  |
| Paralysis / Neuromuscular blocker excess                                                            | 0  | 0  | 0  | 0  |
| Obtundation (not drug-related)                                                                      | 13 | 1  | 13 | 1  |
| Inadequate sedation/anxiolysis                                                                      | 0  | 0  | 0  | 0  |
| Inadequate analgesia                                                                                | 0  | 0  | 0  | 0  |
| Withdrawal symptoms                                                                                 | 17 | 17 | 13 | 15 |
| Other neurologic                                                                                    | 6  | 7  | 2  | 5  |
| <b>Cardiovascular</b>                                                                               |    |    |    |    |
| Cardiac Arrest                                                                                      | 31 | 23 | 8  | 15 |
| Hypotension                                                                                         | 9  | 10 | 3  | 5  |
| Hypertension                                                                                        | 4  | 2  | 4  | 1  |
| Low cardiac output                                                                                  | 4  | 1  | 4  | 1  |
| Shock (non-cardiogenic) (hypotension and oliguria or altered sensorium or peripheral hypoperfusion) | 5  | 3  | 4  | 1  |
| Arrhythmias / Conduction abnormality (new VT, VF, AF, SVT, bradycardia or heart block)              | 5  | 13 | 3  | 5  |
| Myocardial infarction/ischemia (ECG changes and/or increased troponin or CK-MB)                     | 0  | 0  | 0  | 0  |
| Pulmonary edema (Increased [A-a] O <sub>2</sub> gradient or new CXR clinical findings or PCWP≥18)   | 0  | 3  | 0  | 3  |
| Peripheral (extremity) ischemia (absent pulses or skin color and temperature changes)               | 0  | 3  | 0  | 1  |
| Other cardiovascular                                                                                | 6  | 0  | 4  | 0  |
| <b>Hematologic</b>                                                                                  |    |    |    |    |
| Hemorrhage (Hct ↓ > 5% or needs RBC transfusions)                                                   | 28 | 22 | 17 | 15 |
| Thromboembolic event - venous                                                                       | 9  | 21 | 4  | 16 |
| Thromboembolic event - arterial                                                                     | 3  | 3  | 0  | 1  |
| Hematoma                                                                                            | 2  | 2  | 2  | 2  |
| Other Hematologic, Specify                                                                          | 9  | 9  | 6  | 5  |
| <b>Other Categories</b>                                                                             |    |    |    |    |
| Hypothermia (Temperature < 35° C)                                                                   | 2  | 5  | 0  | 5  |
| Pyrexia (Temperature > 39° C)                                                                       | 0  | 0  | 0  | 0  |
| Alcohol or drug withdrawal                                                                          | 8  | 6  | 7  | 3  |
| Allergic reaction (e.g. rash, hives, anaphylaxis)                                                   | 3  | 5  | 1  | 2  |
| Fall                                                                                                | 0  | 0  | 0  | 0  |
| Pressure Ulcer                                                                                      | 10 | 19 | 10 | 19 |

---

|                                             |    |    |    |    |
|---------------------------------------------|----|----|----|----|
| Death                                       | 21 | 9  | 5  | 2  |
| Rash (non-allergic)                         | 1  | 0  | 0  | 0  |
| Line complication                           | 41 | 38 | 37 | 36 |
| Tube complication (chest tube, foley, etc.) | 6  | 4  | 6  | 4  |
| Other harm type not listed above            | 37 | 37 | 26 | 31 |

---

Table 3. Proportion of compliance on the key elements of verbal handoffs in each site

| Verbal Site | Illness severity |         | Patient summary |         | Action list  |         | Situation awareness and contingency plans |         | Synthesis by the receiver |         |
|-------------|------------------|---------|-----------------|---------|--------------|---------|-------------------------------------------|---------|---------------------------|---------|
|             | Intervention     | Control | Intervention    | Control | Intervention | Control | Intervention                              | Control | Intervention              | Control |
| 1           | 81.7%            | 0.0%    | 93.3%           | 10.5%   | 63.3%        | 4.0%    | 10.0%                                     | 0.0%    | 93.3%                     | 2.6%    |
| 2           | 73.8%            | 4.0%    | 100.0%          | 81.6%   | 96.7%        | 36.8%   | 16.4%                                     | 9.2%    | 62.3%                     | 0.0%    |
| 3           | 65.4%            | 0.0%    | 99.0%           | 65.5%   | 81.2%        | 0.0%    | 53.5%                                     | 0.0%    | 85.2%                     | 0.0%    |
| 4           | 83.3%            | 0.0%    | 93.8%           | 61.9%   | 83.3%        | 22.6%   | 58.3%                                     | 4.8%    | 95.8%                     | 36.9%   |
| 5           | 83.8%            | 34.7%   | 100.0%          | 91.7%   | 36.3%        | 12.5%   | 2.5%                                      | 1.4%    | 90.0%                     | 0.0%    |
| 6           | 73.7%            | 63.3%   | 96.8%           | 90.0%   | 95.8%        | 83.3%   | 99.0%                                     | 73.3%   | 67.4%                     | 46.7%   |

Table 4. Proportion of compliance on the key elements of written handoffs in each site

| Written Site | Illness severity |         | Patient summary |         | Action list  |         | Situation awareness and contingency plans |         | Synthesis by the receiver |         |
|--------------|------------------|---------|-----------------|---------|--------------|---------|-------------------------------------------|---------|---------------------------|---------|
|              | Intervention     | Control | Intervention    | Control | Intervention | Control | Intervention                              | Control | Intervention              | Control |
| 1            | 98.3%            | 0.0%    | 95.0%           | 1.3%    | 68.3%        | 15.8%   | 10.0%                                     | 0.0%    | 96.7%                     | 1.3%    |
| 2            | 98.4%            | 1.3%    | 100.0%          | 61.8%   | 45.9%        | 7.9%    | 37.7%                                     | 1.3%    | 16.4%                     | 0.0%    |
| 3            | 93.1%            | 1.7%    | 97.0%           | 46.6%   | 93.1%        | 13.8%   | 71.3%                                     | 0.0%    | 88.1%                     | 0.0%    |
| 4            | 95.8%            | 0.0%    | 100.0%          | 86.9%   | 91.7%        | 10.7%   | 83.3%                                     | 0.0%    | 95.8%                     | 0.0%    |
| 5            | 86.1%            | 0.0%    | 88.6%           | 0.0%    | 13.9%        | 0.0%    | 1.3%                                      | 0.0%    | 8.7                       | 0.0%    |
| 6            | 82.1%            | 20.0%   | 87.4%           | 60.0%   | 92.6%        | 73.3%   | 94.7%                                     | 70.0%   | 66.3%                     | 16.7%   |
